# Supplementary material
Source: PubMed Central journal article supplement (PMC3648009)
Supplement: IAI.01265-12_zii999090128so1.pdf [file IAI.01265-12_zii999090128so1.pdf]

## Supplement:

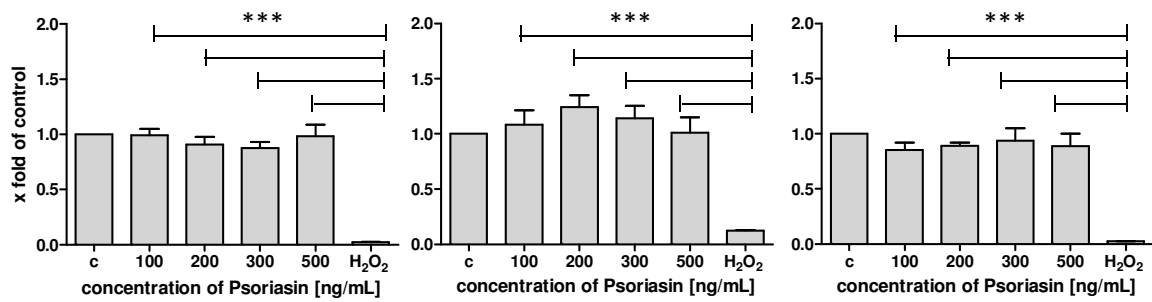

**Figure 1: Viable cells after treatment with recombinant Psoriasisin.** Astrocytes (A), microglia (B) and meningeal cells (C) were stimulated with concentrations of recombinant psoriasis. Cell viability assay were prepared. Graphs show mean values and SEM of n= 6. \*\*\*p< 0.0001 significant difference compared to control as determined using ANOVA test followed by Bonferroni's multiple comparison test.

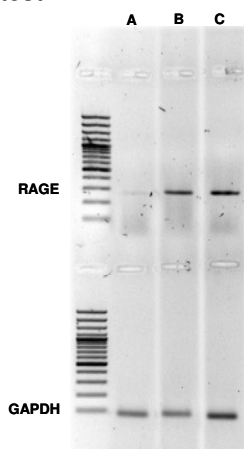

**Figure 2. RT-PCR analysis of RAGE expression in glia cells and meningeal cells.** RAGE mRNA is expressed in untreated meningeal cells and microglia. **A** Astrocytes, **B** Meninges, **C** microglia cells. RT PCR products of RAGE receptor were visualized with 2% agarose gel electrophoresis in the presence of ethidiumbromid. GAPDH PCR was performed as loading control. (RAGE 300kDa and GAPDH 100kDa) were resolved in 2% agarose gel.
